# Supplementary material
Source: PubMed Central journal article supplement (PMC5420314)
Supplement: NIHMS72030-supplement-Supplementary_information.pdf [file NIHMS72030-supplement-Supplementary_information.pdf]

## Supplementary Figure 1- Uncropped scans.

### Main Figures

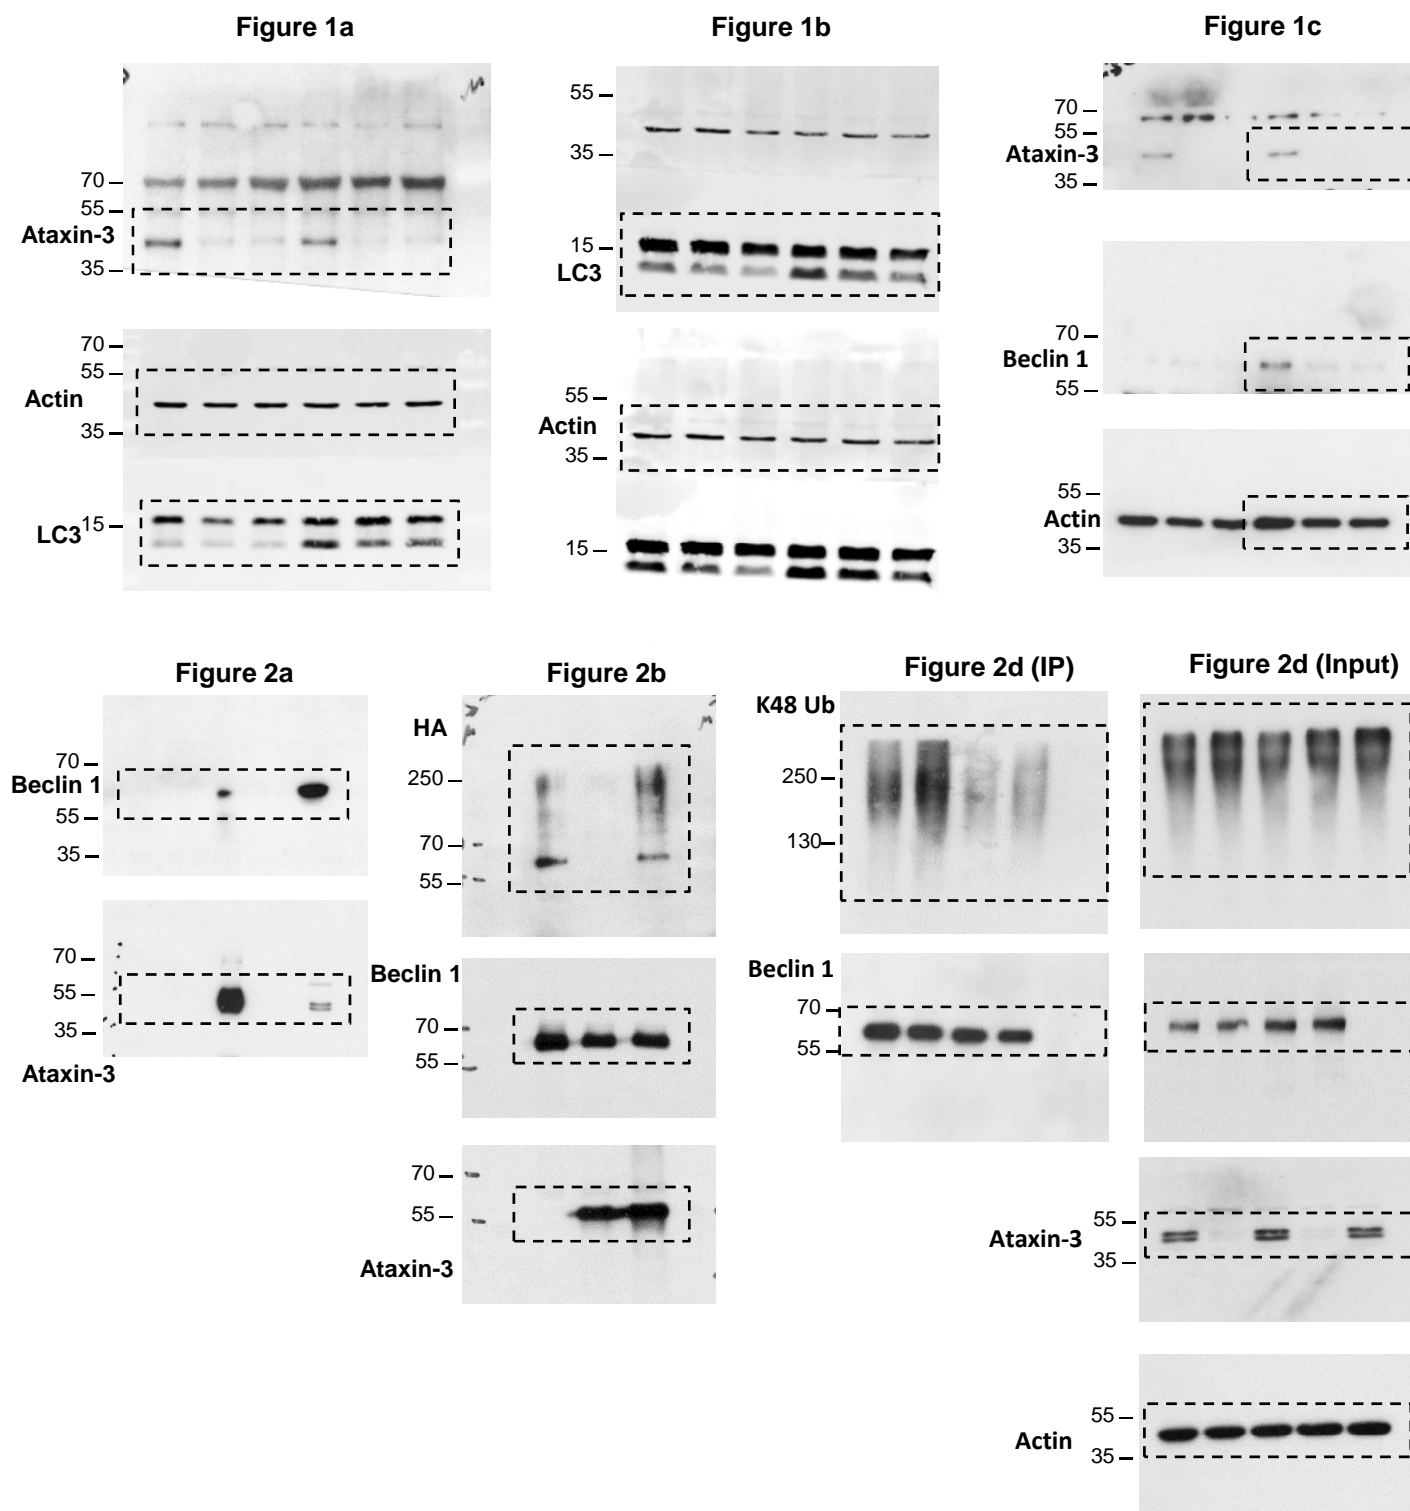

Figure 3a

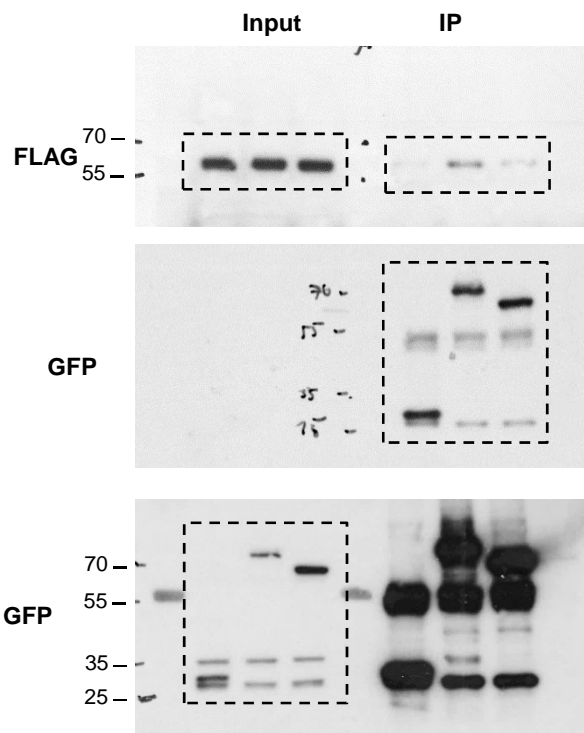

Figure 3b

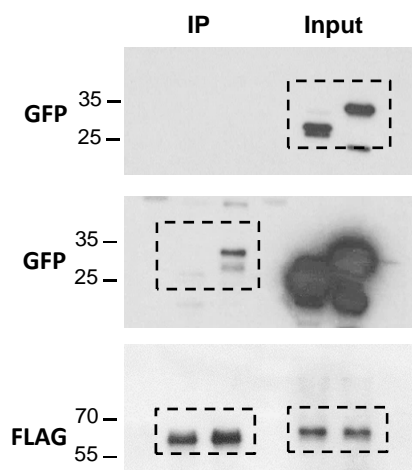

Figure 4a

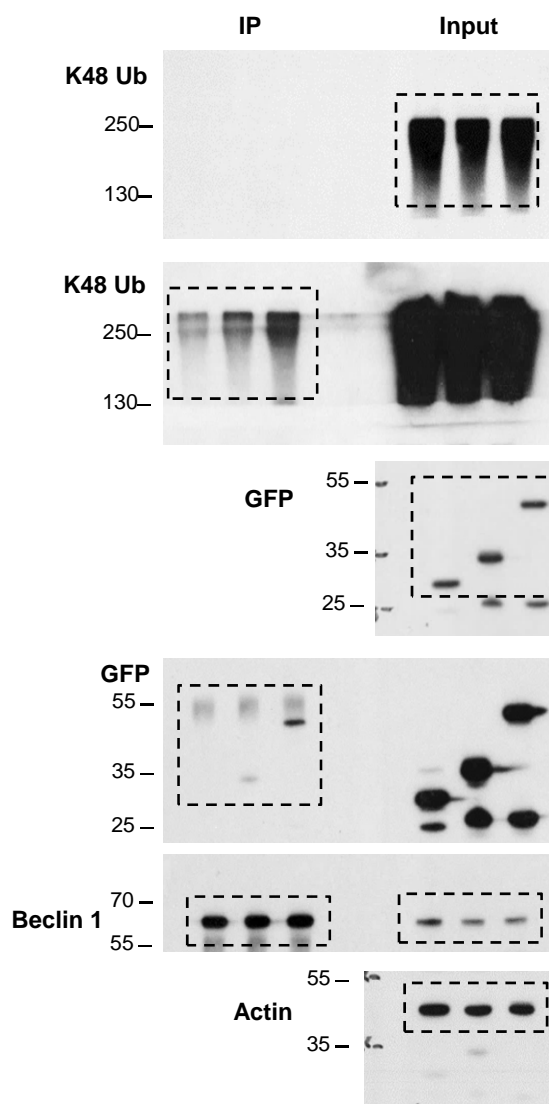

Figure 3c (input)

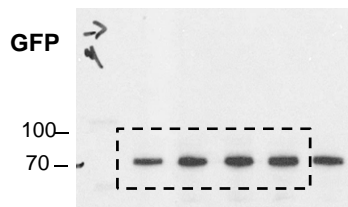

Figure 3c (IP)

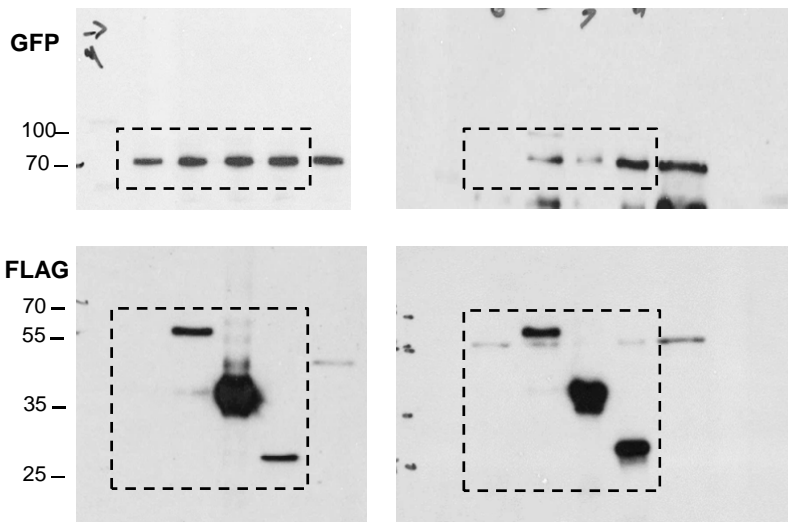

**Figure 4b**

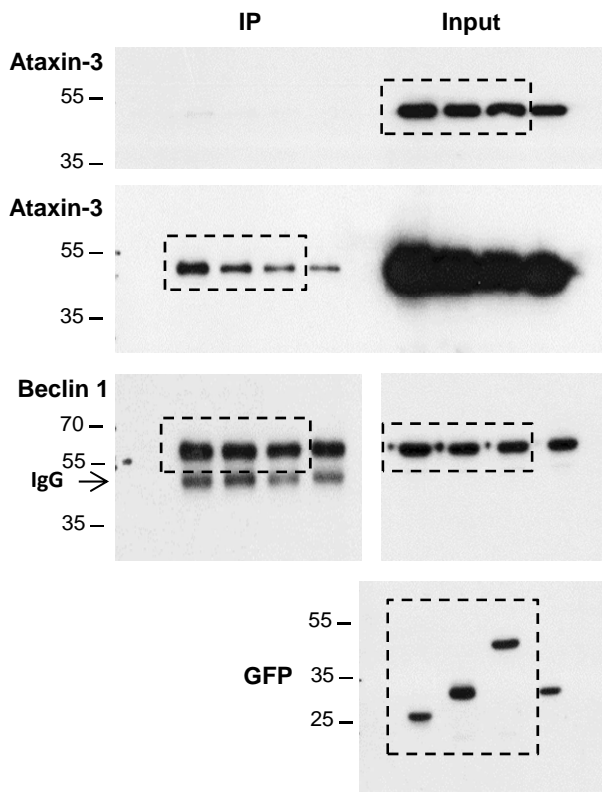

**Figure 4e**

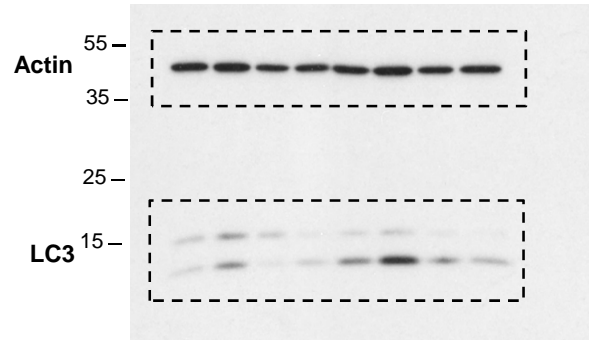

**Figure 4f**

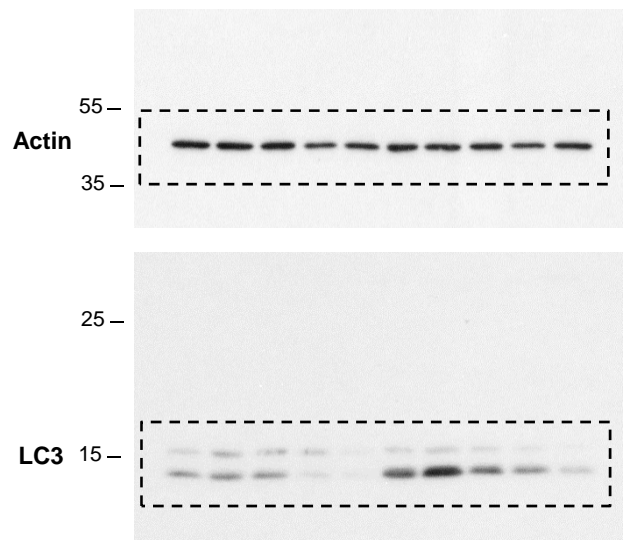

**Figure 4g**

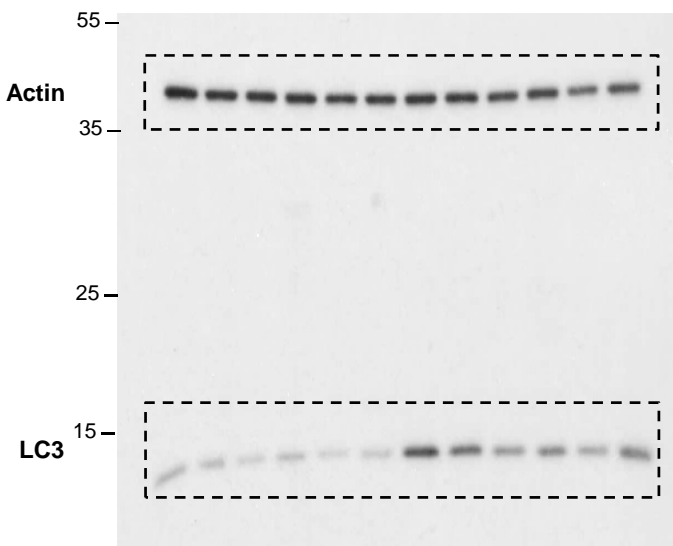

## Extended Data

### Ext Data Figure 1b

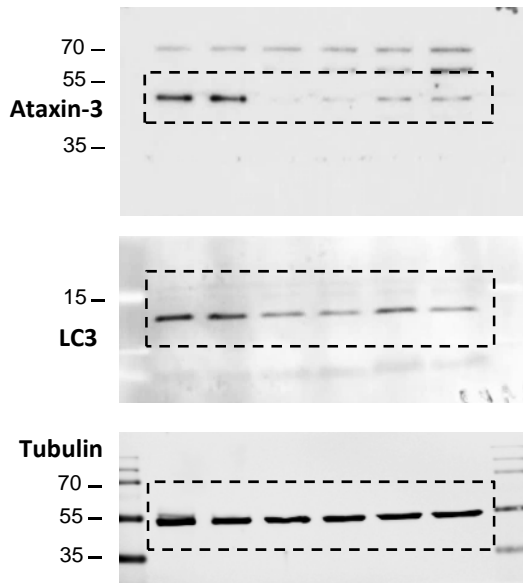

### Ext Data Figure 1c

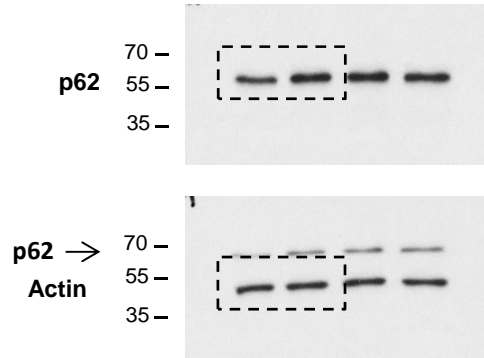

### Ext Data Figure 2d

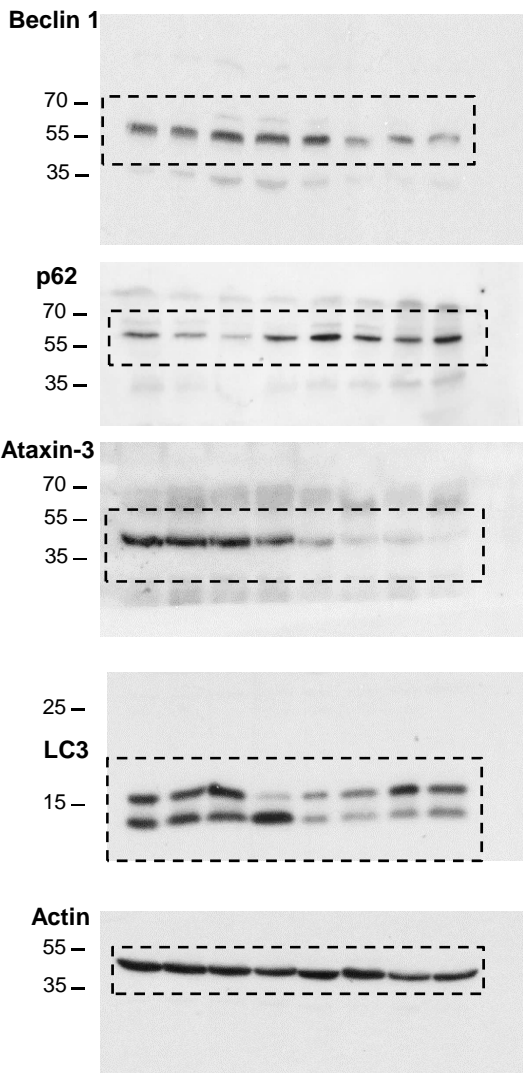

### Ext Data Figure 3a

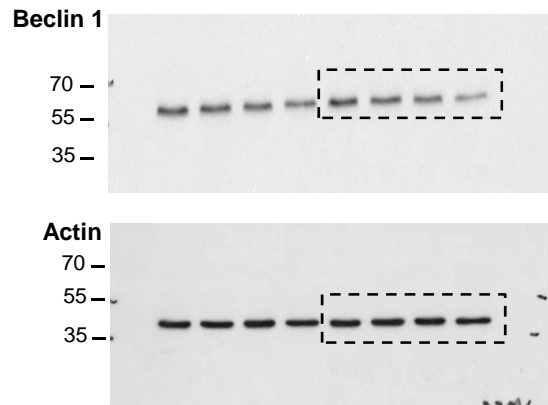

### Ext Data Figure 3b

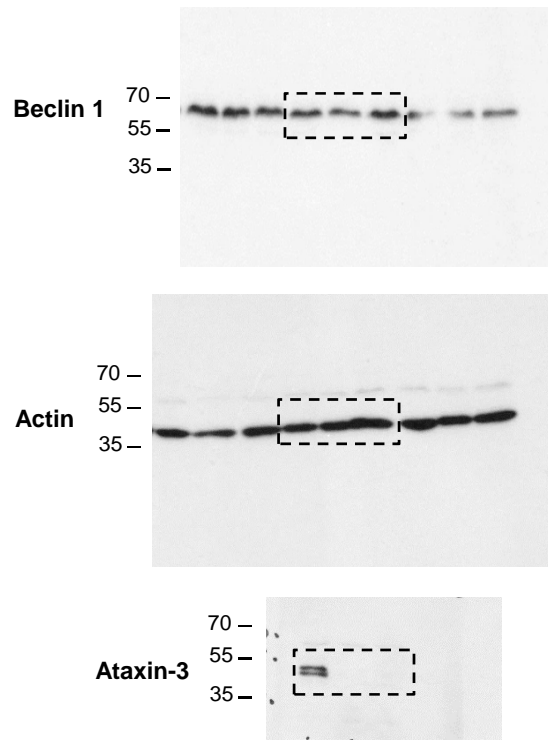

Ext Data Figure 3c

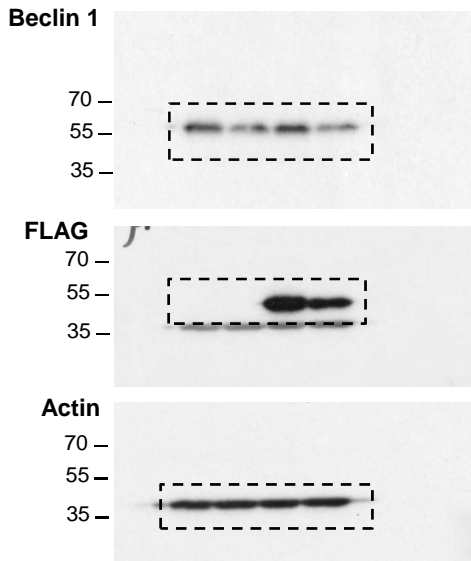

Ext Data Figure 3d

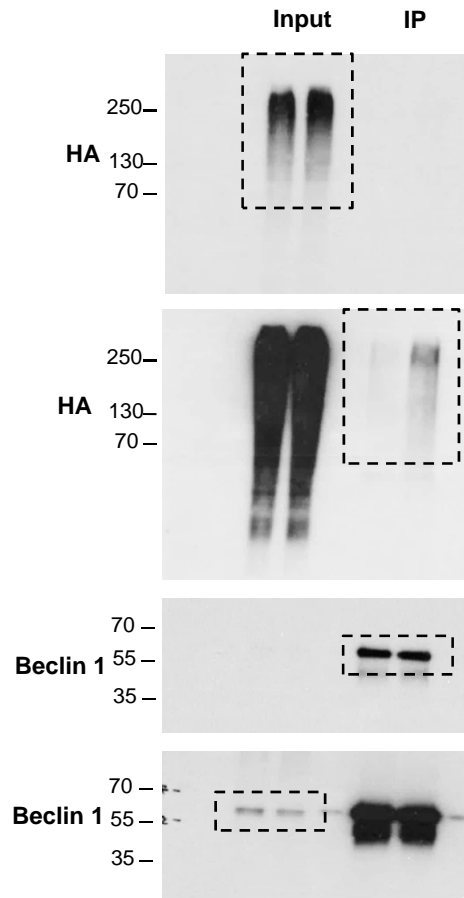

Ext Data Figure 3g

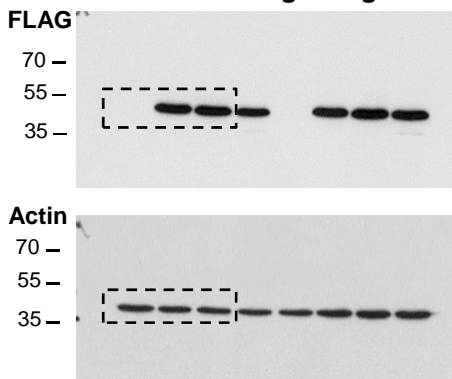

Ext Data Figure 3f

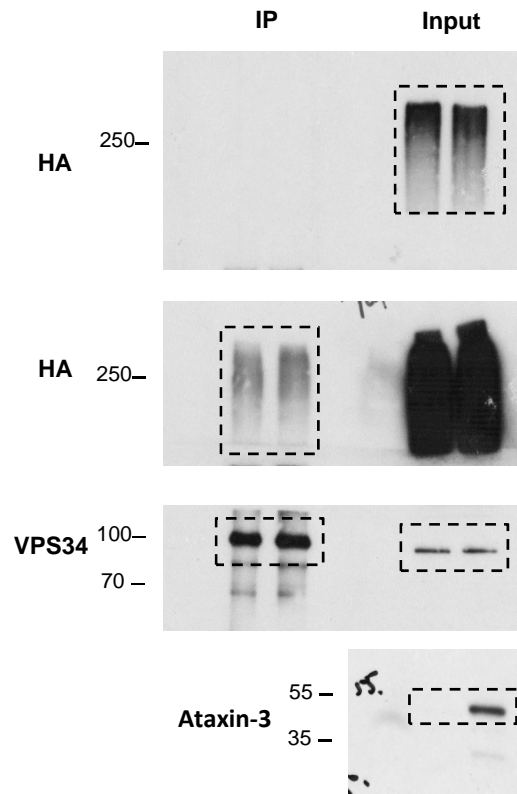

Ext Data Figure 3e

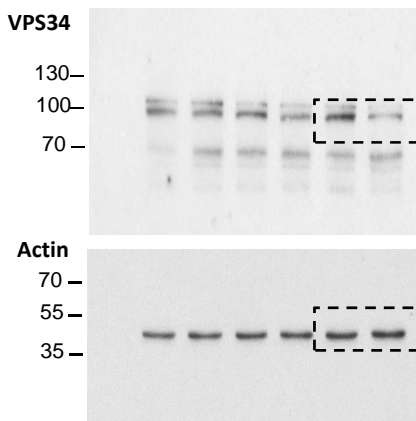

Ext Data Figure 4c

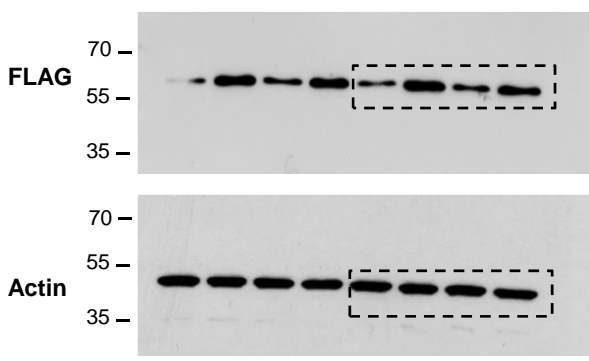

Ext Data Figure 4d

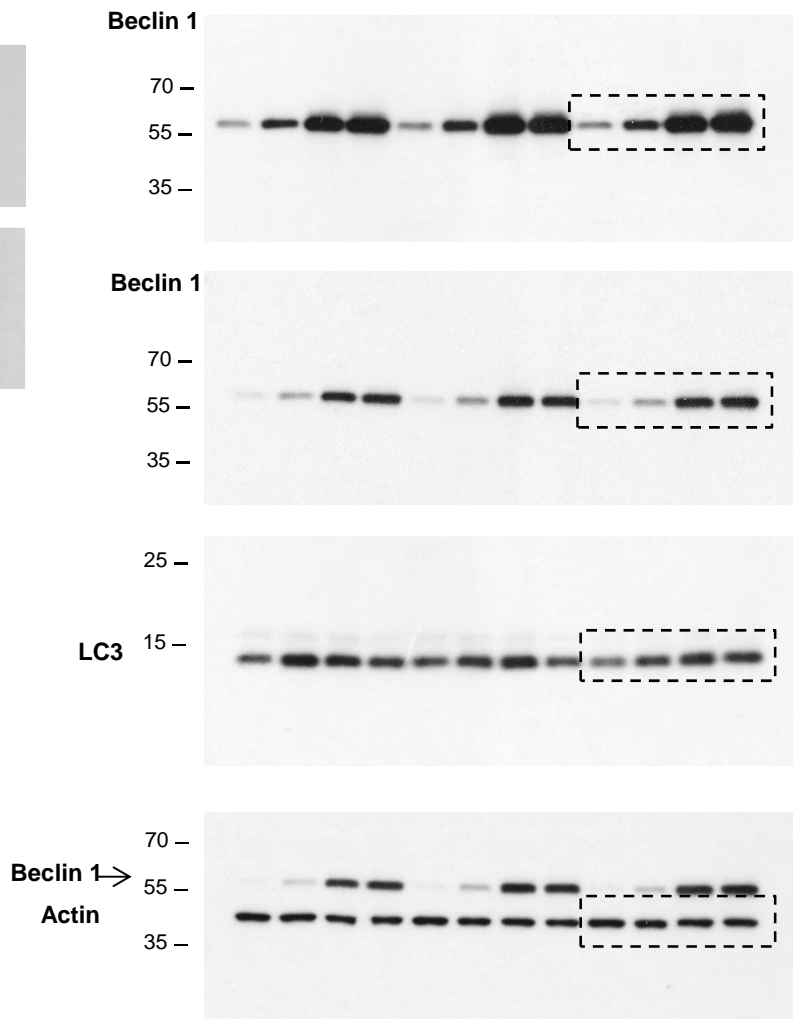

Ext Data Figure 5a

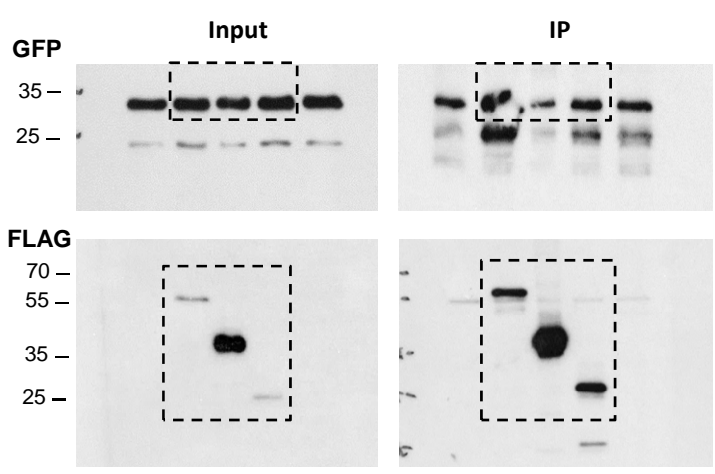

Ataxin-3

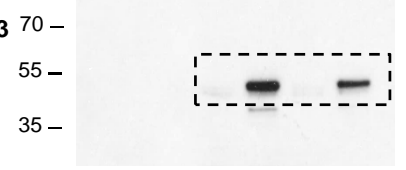

Ext Data Figure 6a

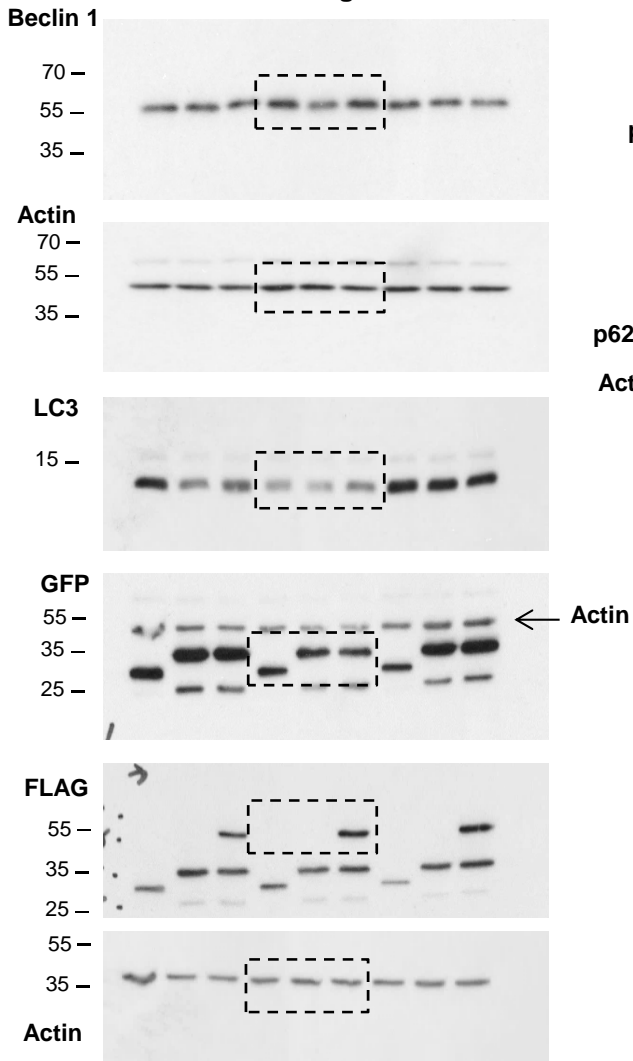

Ext Data Figure 6b

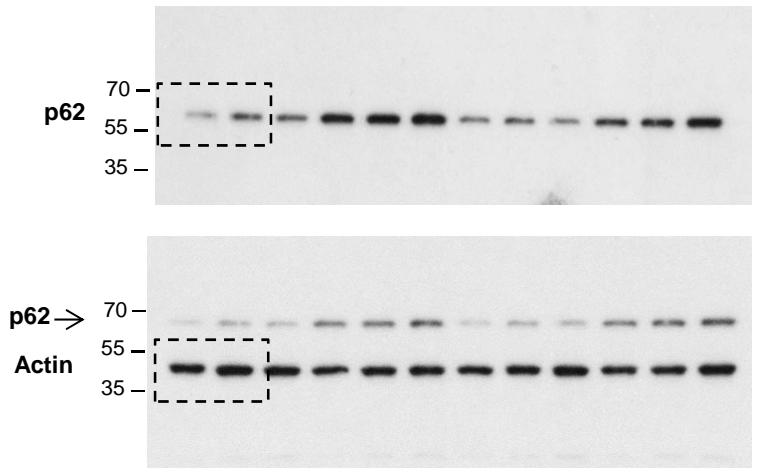

Ext Data Figure 6c

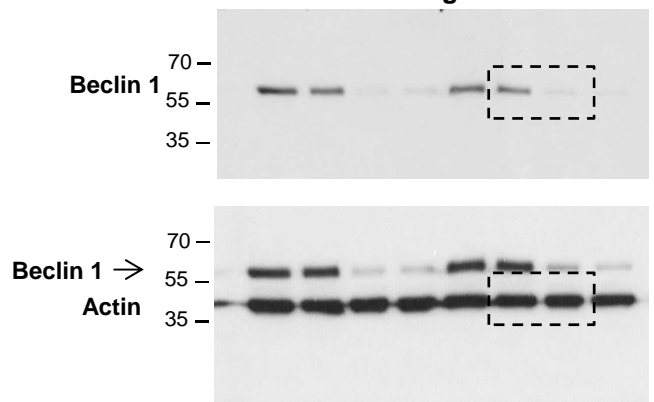

Ext Data Figure 7a

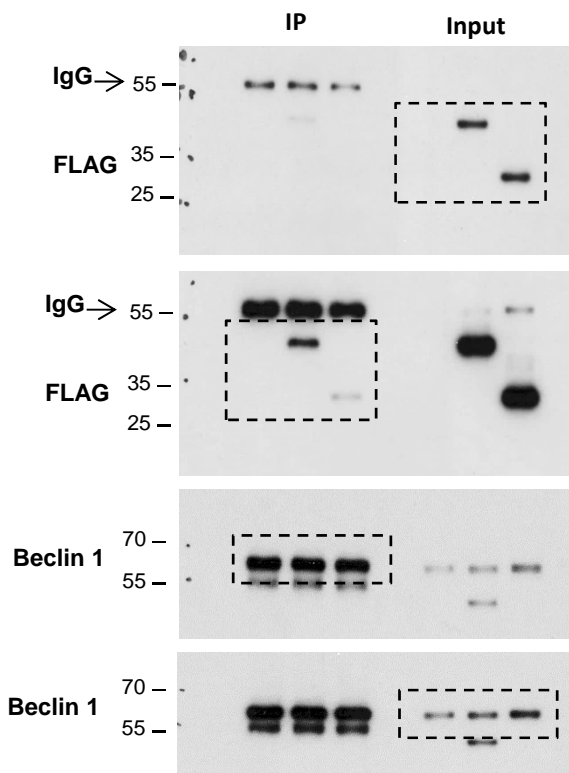

Ext Data Figure 7b

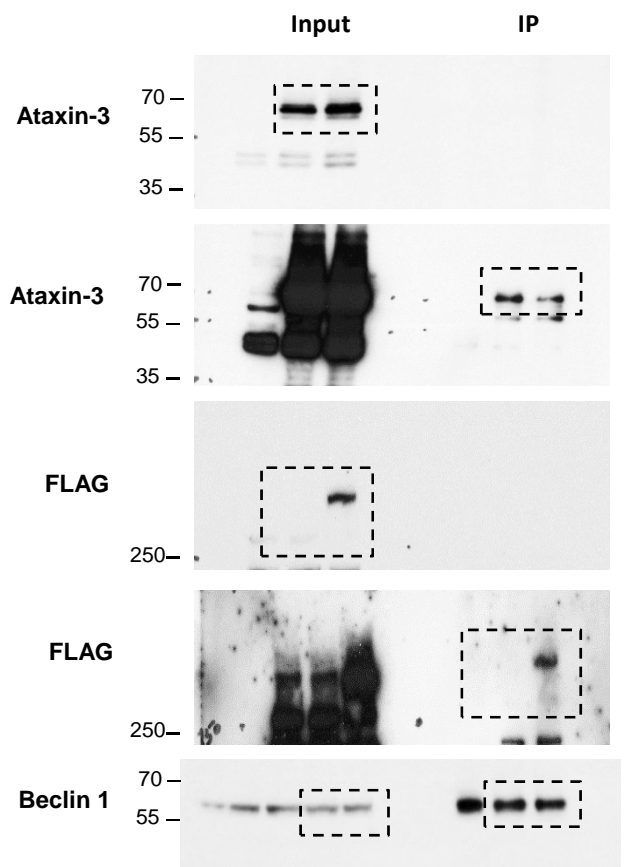

Ext Data Figure 7c

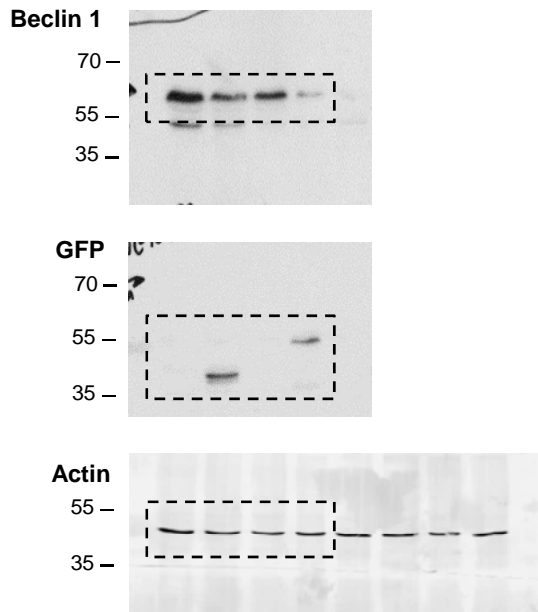

Ext Data Figure 8b

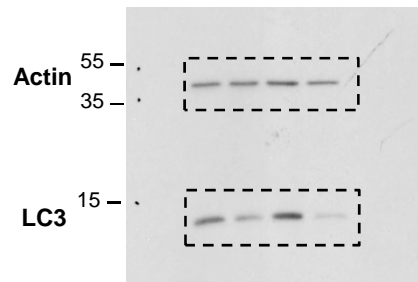

Ext Data Figure 8c

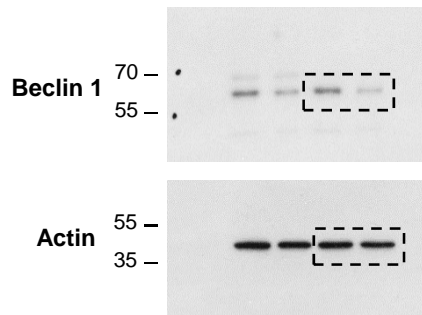

Ext Data Figure 8e

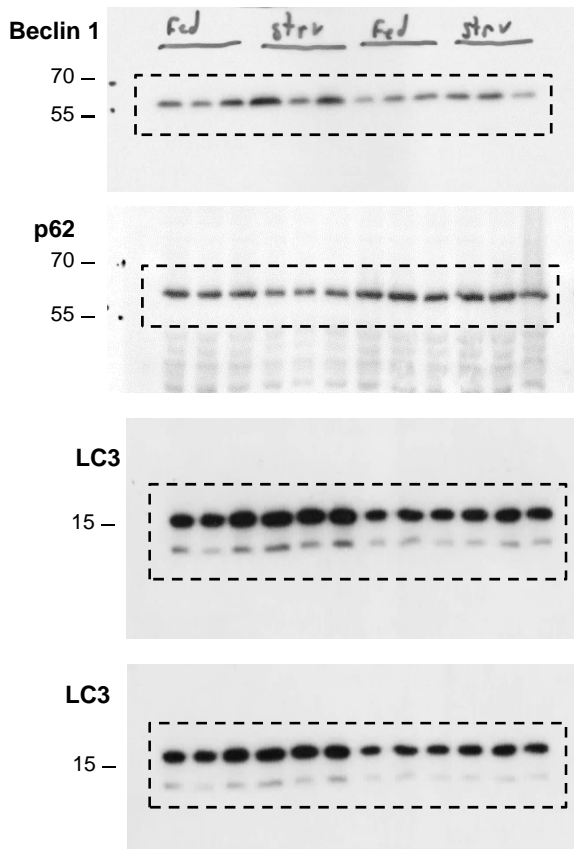

Ext Data Figure 8e (continue)

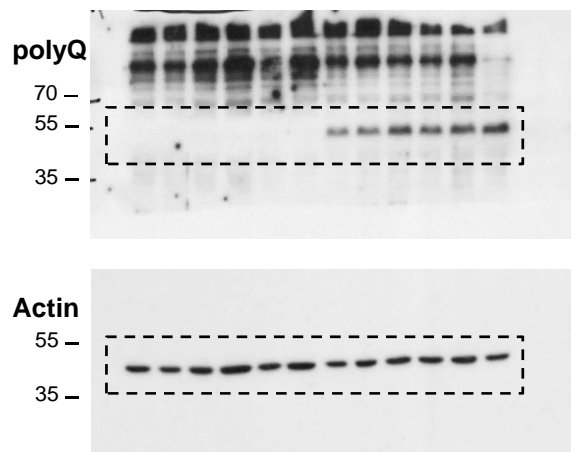



Ext Data Figure 9a

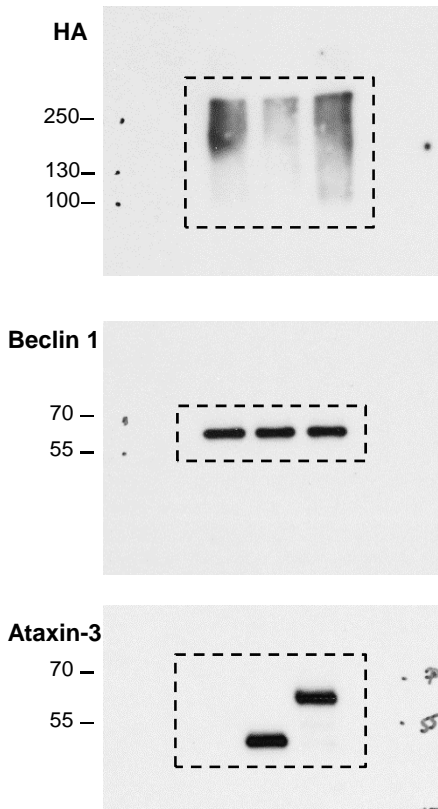

Ext Data Figure 9d

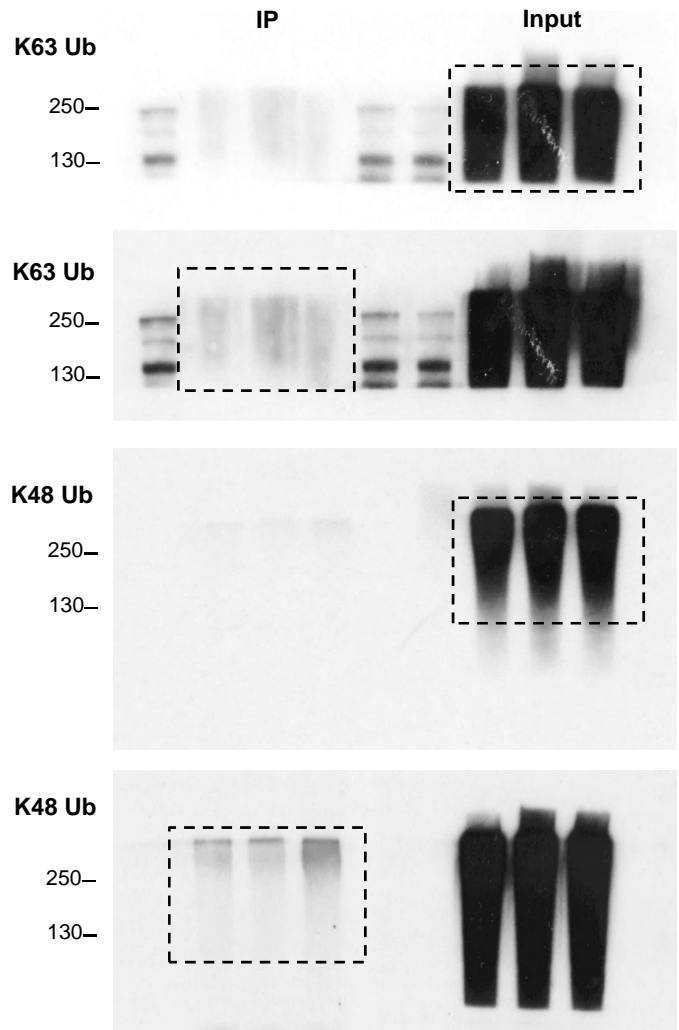

Ext Data Figure 9d (continue)

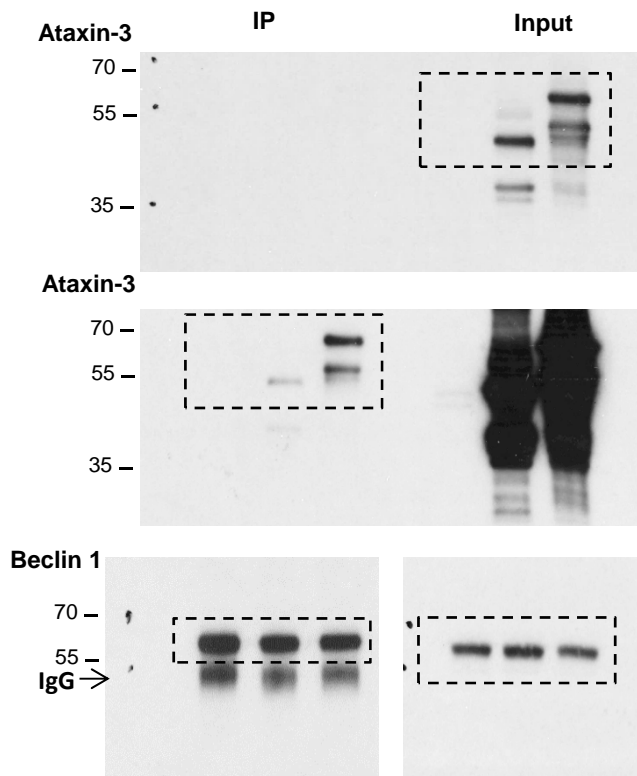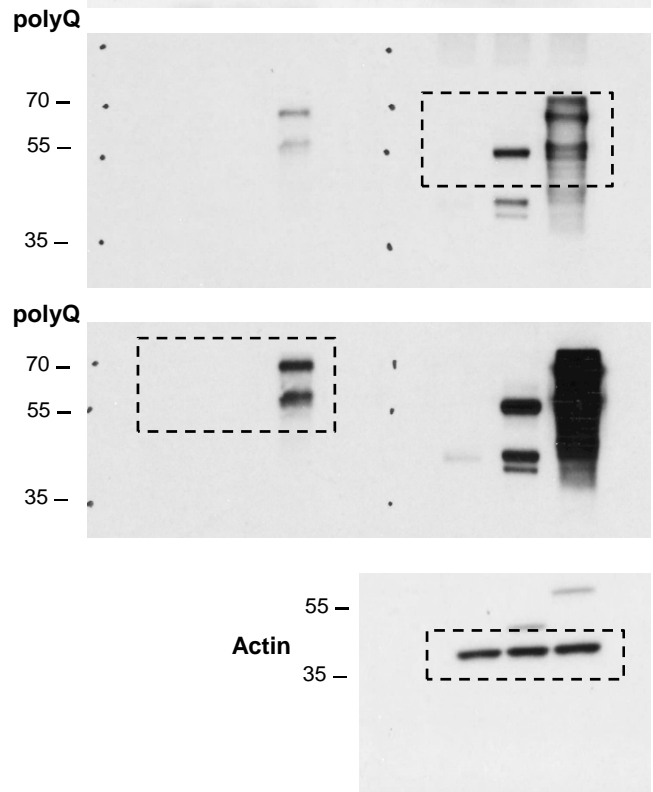

Ext Data Figure 10a

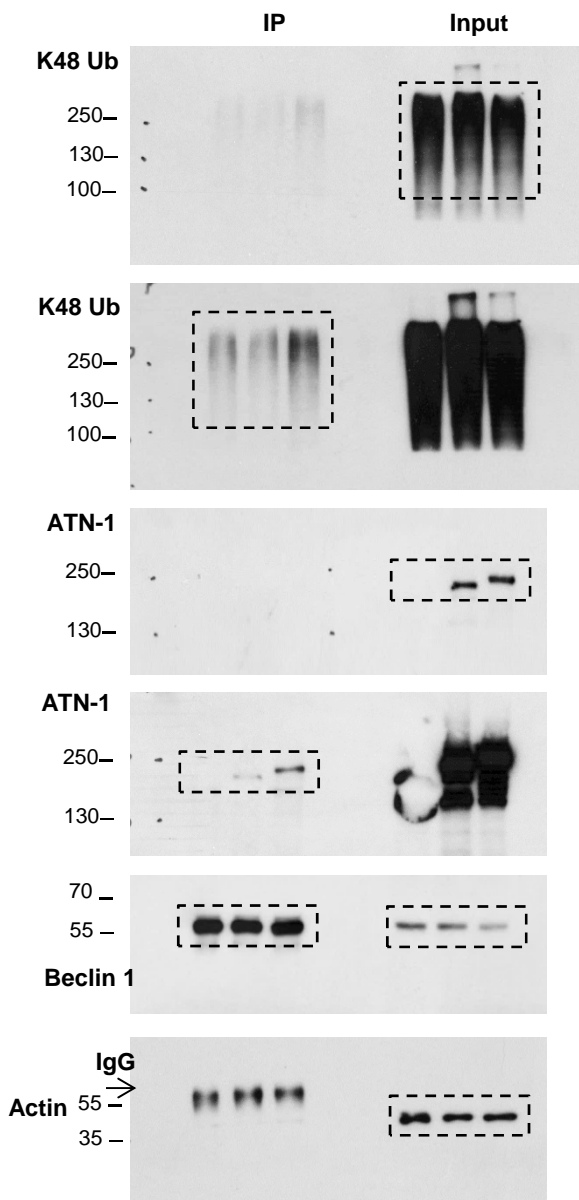

Ext Data Figure 10b

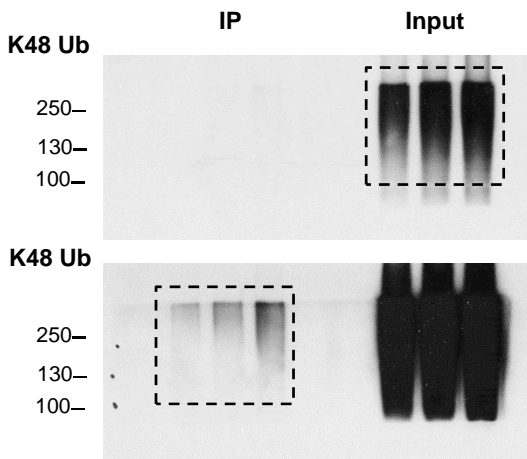

Ext Data Figure 10b (continue)

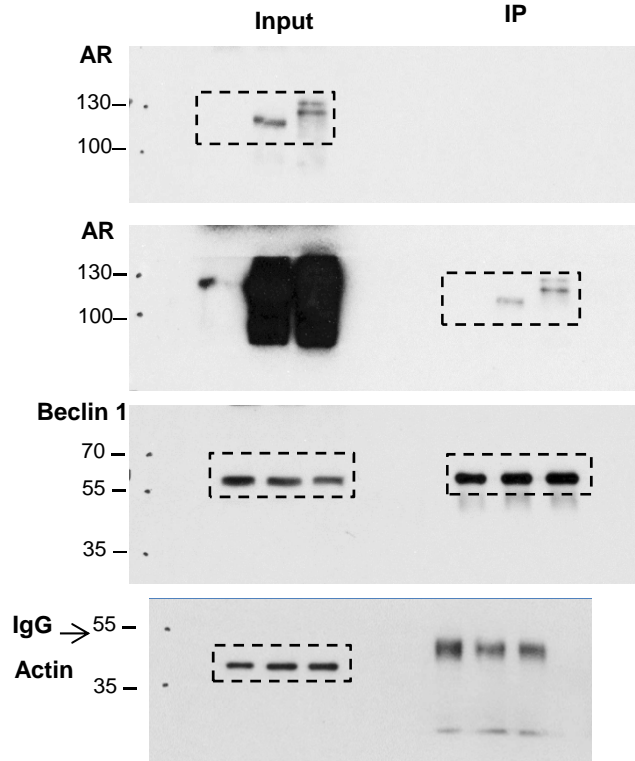

Ext Data Figure 10c

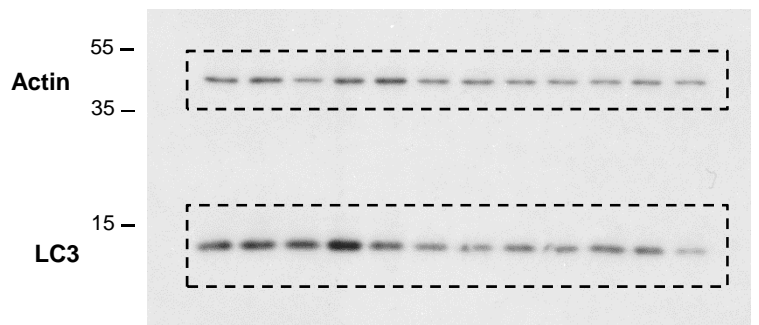

Ext Data Figure 10d

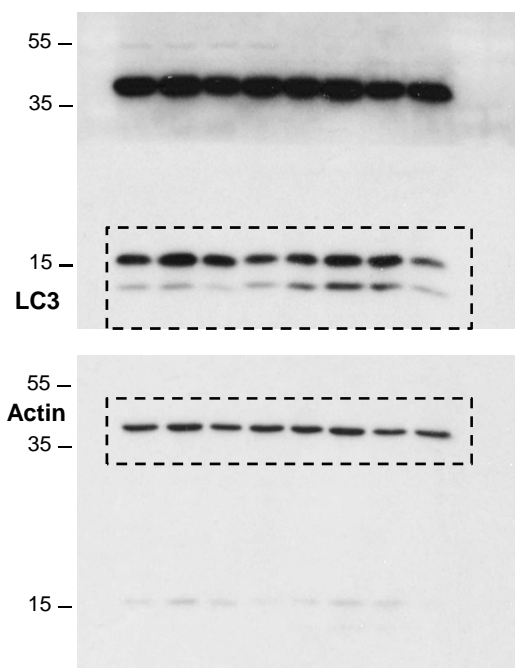

Ext Data Figure 10f

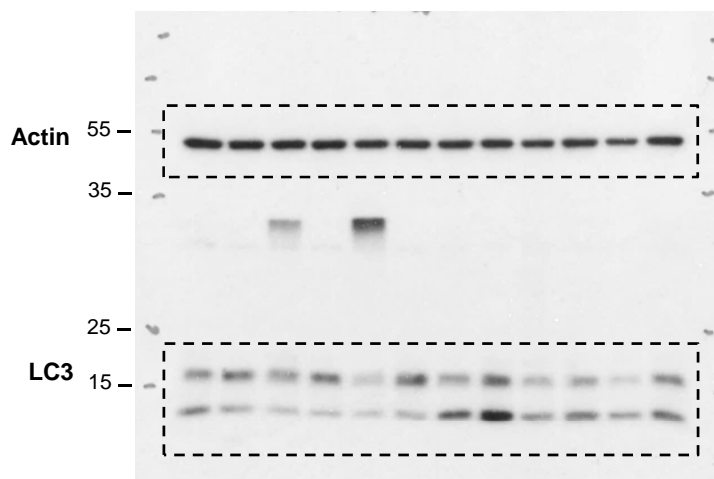

Ext Data Figure 10g

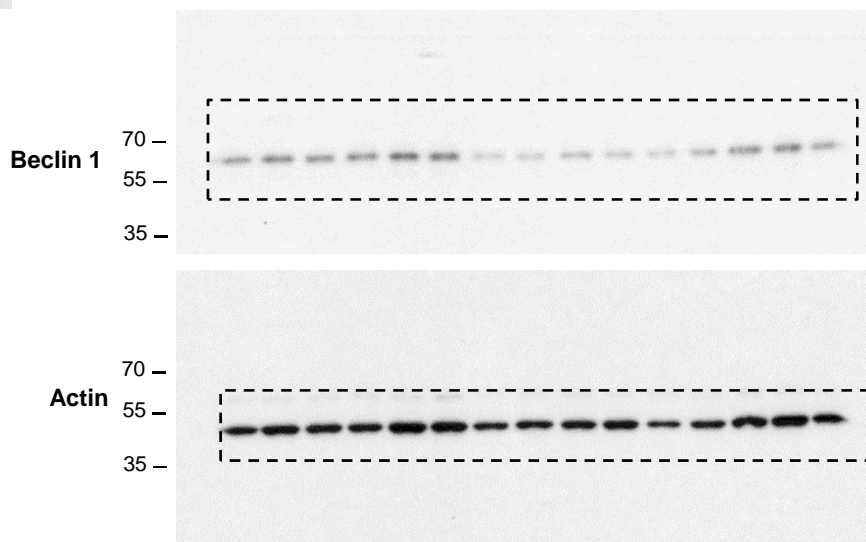

Ext Data Figure 10e

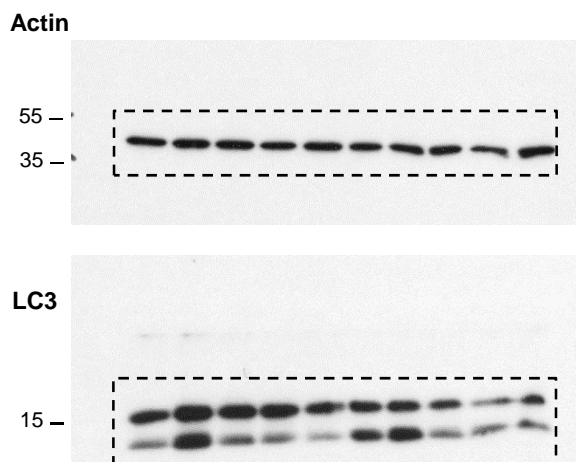

**Table S1. Full statistical analysis of the data from Figure 1 and Figure 4.**

| <b>Figure</b>     | <b>P value for test</b>                                                                               | <b>P value for post-test</b>                                          |
|-------------------|-------------------------------------------------------------------------------------------------------|-----------------------------------------------------------------------|
| <b>Figure 1a</b>  | Two-way ANOVA (column factor shRNA *** P<0.001, row factor BafA1 *** P<0.001, interaction * P<0.05).  | Bonferroni's post-test (* P<0.05, *** P<0.001, N.S, not significant). |
| <b>Figure 1b</b>  | Two-way ANOVA (column factor shRNA ** P<0.01, row factor BafA1 *** P<0.001, interaction P value N.S). | Bonferroni's post-test (** P<0.01, *** P<0.001, N.S).                 |
| <b>Figure 1c</b>  | One-way ANOVA (** P<0.01).                                                                            | Post-hoc Tukey's test (* P<0.05, ** P<0.01).                          |
| <b>Figure 1d</b>  | Two-way ANOVA (column factor siRNA ** P<0.01, row factor fasting ** P<0.01, interaction P value N.S). | Bonferroni's post-test (* P<0.05, ** P<0.01, N.S).                    |
| <b>Figure 1e</b>  | Two-way ANOVA (column factor siRNA * P<0.05, row factor fasting ** P<0.01, interaction P value N.S).  | Bonferroni's post-test (* P<0.05, ** P<0.01, N.S).                    |
| <b>Figure 4 c</b> | Two-way ANOVA (column factor HD ** P<0.01, row factor fasting N.S, interaction P value N.S).          | Bonferroni's post-test (** P<0.01, N.S).                              |
| <b>Figure 4 d</b> | Two-way ANOVA (column factor HD *** P<0.001, row factor fasting * P<0.05, interaction * P<0.05).      | Bonferroni's post-test (** P<0.01, *** P<0.001, N.S).                 |

**Table S2. List of patient-derived fibroblasts analysed in this study.**

| <b>Disease</b> | <b>Catalogue number</b> | <b>Ref in the paper</b> |
|----------------|-------------------------|-------------------------|
| <b>HD</b>      | GM04285                 | HD1                     |
|                | GM04287                 | HD 2                    |
|                | GM04476                 | HD 3                    |
|                | GM04867                 | HD 4                    |
|                | HD 940-01               | HD 5                    |
|                | HD960-01                | HD 6                    |
|                | HD305-01                | HD 7                    |
| <b>DRPLA</b>   | AT2140102               | DRPLA 1                 |
|                | GM13716                 | DRPLA 2                 |
|                | GM13717                 | DRPLA 3                 |
| <b>SCA3</b>    | GM06151                 | SCA3 1                  |
|                | GM06153                 | SCA3 2                  |
| <b>SCA7</b>    | GM03561                 | SCA7 1                  |
